# Supplementary material
Source: PubMed Central journal article supplement (PMC7080318)
Supplement: NIHMS1547649-supplement-Supplementary_Data_1.pdf [file NIHMS1547649-supplement-Supplementary_Data_1.pdf]

**Supplementary Table 1** - Analysis of fitness interactions among previously known LINE-1 interactors (modify retrotransposition and/or physically bind LINE-1 proteins).

| direction (LINE-1 vs. Luc.) | NAME                                                         | NOM p-val | FDR q-val | FWER p-val |
|-----------------------------|--------------------------------------------------------------|-----------|-----------|------------|
| downregulated               | REACTOME_DNA_REPLICATION                                     | 0         | 0         | 0          |
| downregulated               | REACTOME_CELL_CYCLE_MITOTIC                                  | 0         | 0         | 0          |
| downregulated               | HALLMARK_E2F_TARGETS                                         | 0         | 0         | 0          |
| downregulated               | HALLMARK_G2M_CHECKPOINT                                      | 0         | 0         | 0          |
| downregulated               | REACTOME_MITOTIC_M_M_G1_PHASES                               | 0         | 0         | 0          |
| downregulated               | REACTOME_CELL_CYCLE                                          | 0         | 0         | 0          |
| downregulated               | HALLMARK_MITOTIC_SPINDLE                                     | 0         | 0         | 0          |
| downregulated               | REACTOME_DNA_STRAND_ELONGATION                               | 0         | 0         | 0          |
| downregulated               | REACTOME_MITOTIC_PROMETAPHASE                                | 0         | 0         | 0          |
| downregulated               | REACTOME_G1_S_TRANSITION                                     | 0         | 0         | 0          |
| downregulated               | KEGG_DNA_REPLICATION                                         | 0         | 0         | 0          |
| downregulated               | REACTOME_S_PHASE                                             | 0         | 0         | 0          |
| downregulated               | REACTOME_SYNTHESIS_OF_DNA                                    | 0         | 0         | 0          |
| downregulated               | REACTOME_MITOTIC_G1_G1_S_PHASES                              | 0         | 0         | 0          |
| downregulated               | REACTOME_CELL_CYCLE_CHECKPOINTS                              | 0         | 0         | 0          |
| downregulated               | REACTOME_METABOLISM_OF_RNA                                   | 0         | 0         | 0          |
| downregulated               | REACTOME_G2_M_CHECKPOINTS                                    | 0         | 0         | 0          |
| downregulated               | REACTOME_ACTIVATION_OF_ATR_IN_RESPONSE_TO_REPLICATION_STRESS | 0         | 0         | 0          |
| downregulated               | HALLMARK_MYC_TARGETS_V1                                      | 0         | 0         | 0          |
| downregulated               | REACTOME_MITOTIC_G2_G2_M_PHASES                              | 0         | 0         | 0          |
| downregulated               | REACTOME_DNA_REPAIR                                          | 0         | 0         | 0          |
| downregulated               | REACTOME_ACTIVATION_OF_THE_PRE_REPLICATIVE_COMPLEX           | 0         | 0         | 0          |
| downregulated               | REACTOME_M_G1_TRANSITION                                     | 0         | 0         | 0          |
| downregulated               | KEGG_CELL_CYCLE                                              | 0         | 0         | 0          |
| downregulated               | REACTOME_METABOLISM_OF_MRNA                                  | 0         | 0         | 0          |
| downregulated               | REACTOME_INFLUENZA_LIFE_CYCLE                                | 0         | 0         | 0          |
| downregulated               | REACTOME_TRANSLATION                                         | 0         | 0         | 0          |
| downregulated               | REACTOME_E2F_MEDIATED_REGULATION_OF_DNA_REPLICATION          | 0         | 0         | 0          |

**Supplementary Table 1** - Analysis of fitness interactions among previously known LINE-1 interactors (modify retrotransposition and/or physically bind LINE-1 proteins).

|               |                                                                                                                |            |          |       |
|---------------|----------------------------------------------------------------------------------------------------------------|------------|----------|-------|
| downregulated | REACTOME_3_UTR_MEDIATED_TRANSLATIONAL_REGULATION                                                               | 0          | 0        | 0     |
| downregulated | REACTOME_SRP_DEPENDENT_COTRANSLATIONAL_PROTEIN_TARGETING_TO_MEMBRANE                                           | 0          | 0        | 0     |
| downregulated | REACTOME_EXTENSION_OF_TELOMERES                                                                                | 0          | 0        | 0     |
| downregulated | REACTOME_MRNA_PROCESSING                                                                                       | 0          | 0        | 0     |
| downregulated | REACTOME_PROCESSING_OF_CAPPED_INTRON_CONTAINING_PRE_MRNA                                                       | 0          | 0        | 0     |
| downregulated | REACTOME_INFLUENZA_VIRAL_RNA_TRANSCRIPTION_AND_REPLICATION                                                     | 0          | 0        | 0     |
| downregulated | REACTOME_NONSENSE_MEDIATED_DECAY_ENHANCED_BY_THE_EXON_JUNCTION_COMPLEX                                         | 0          | 0        | 0     |
| downregulated | KEGG_RIBOSOME                                                                                                  | 0          | 0        | 0     |
| downregulated | REACTOME_PEPTIDE_CHAIN_ELONGATION                                                                              | 0          | 0        | 0     |
| downregulated | KEGG_OOCYTE_MEIOSIS                                                                                            | 0          | 0        | 0     |
| downregulated | KEGG_PROGESTERONE_MEDIATED_OOCYTE_MATURATION                                                                   | 0          | 0        | 0     |
| downregulated | REACTOME_REGULATION_OF_MITOTIC_CELL_CYCLE                                                                      | 0          | 0        | 0     |
| downregulated | HALLMARK_DNA_REPAIR                                                                                            | 0          | 9.80E-05 | 0.002 |
| downregulated | REACTOME_MRNA_SPLICING                                                                                         | 0          | 9.57E-05 | 0.002 |
| downregulated | REACTOME_FORMATION_OF_THE_TERNARY_COMPLEX_AND_SUBSEQUENTLY_THE_43S_COMPLEX                                     | 0          | 1.32E-04 | 0.003 |
| downregulated | KEGG_SPLICEOSOME                                                                                               | 0          | 1.73E-04 | 0.004 |
| downregulated | REACTOME_ACTIVATION_OF_THE_MRNA_UPON_BINDING_OF_THE_CAP_BINDING_COMPLEX_AND_EIF5_AND_SUBSEQUENT_BINDING_TO_43S | 0          | 1.69E-04 | 0.004 |
| downregulated | REACTOME_METABOLISM_OF_NON_CODING_RNA                                                                          | 0          | 2.96E-04 | 0.007 |
| downregulated | KEGG_PYRIMIDINE_METABOLISM                                                                                     | 0.00440529 | 7.00E-04 | 0.017 |
| upregulated   | REACTOME_INTERFERON_ALPHA_BETA_SIGNALING                                                                       | 0          | 0        | 0     |
| upregulated   | REACTOME_INTERFERON_SIGNALING                                                                                  | 0          | 0        | 0     |
| upregulated   | HALLMARK_INTERFERON_GAMMA_RESPONSE                                                                             | 0          | 0        | 0     |
| upregulated   | HALLMARK_INTERFERON_ALPHA_RESPONSE                                                                             | 0          | 0        | 0     |
| upregulated   | REACTOME_CYTOKINE_SIGNALING_IN_IMMUNE_SYSTEM                                                                   | 0          | 0        | 0     |
| upregulated   | HALLMARK_TNFA_SIGNALING_VIA_NFKB                                                                               | 0          | 0        | 0     |
| upregulated   | KEGG_CYTOKINE_CYTOKINE_RECEPTOR_INTERACTION                                                                    | 0          | 0        | 0     |
| upregulated   | HALLMARK_INFLAMMATORY_RESPONSE                                                                                 | 0          | 0        | 0     |

**Supplementary Table 1** - Analysis of fitness interactions among previously known LINE-1 interactors (modify retrotransposition and/or physically bind LINE-1 proteins).

|             |                                                                |            |            |       |
|-------------|----------------------------------------------------------------|------------|------------|-------|
| upregulated | KEGG_SYSTEMIC_LUPUS_ERYTHEMATOSUS                              | 0          | 0          | 0     |
| upregulated | REACTOME_INTERFERON_GAMMA_SIGNALING                            | 0          | 7.50E-05   | 0.001 |
| upregulated | REACTOME_RNA_POL_I_PROMOTER_OPENING                            | 0          | 2.81E-04   | 0.004 |
| upregulated | HALLMARK_KRAS_SIGNALING_UP                                     | 0          | 2.58E-04   | 0.004 |
| upregulated | KEGG_TOLL_LIKE_RECEPTOR_SIGNALING_PATHWAY                      | 0          | 3.57E-04   | 0.006 |
| upregulated | REACTOME_IMMUNE_SYSTEM                                         | 0          | 3.85E-04   | 0.007 |
| upregulated | REACTOME_AMYLOIDS                                              | 0          | 4.13E-04   | 0.008 |
| upregulated | REACTOME_RNA_POL_I_TRANSCRIPTION                               | 0          | 3.87E-04   | 0.008 |
| upregulated | REACTOME_CLASS_A1_RHODOPSIN_LIKE_RECEPTORS                     | 0.00125786 | 3.65E-04   | 0.008 |
| upregulated | HALLMARK_IL6_JAK_STAT3_SIGNALING                               | 0          | 3.89E-04   | 0.009 |
| upregulated | HALLMARK_P53_PATHWAY                                           | 0          | 5.69E-04   | 0.014 |
| upregulated | HALLMARK_COMPLEMENT                                            | 0.00116279 | 6.52E-04   | 0.017 |
| upregulated | KEGG_LEISHMANIA_INFECTION                                      | 0          | 6.58E-04   | 0.018 |
| upregulated | REACTOME_RNA_POL_I_RNA_POL_III_AND_MITOCHONDRIAL_TRANSCRIPTION | 0          | 0.00101581 | 0.028 |
| upregulated | HALLMARK_APOPTOSIS                                             | 0          | 0.00120769 | 0.034 |

**Supplementary Table 4 - Overrepresentation analysis results for GO terms among the 1,390 significant growth interactions using the Webgestalt program.**

| category           | geneset    | description                               | link                                                                                                                  | P          | FDR        | OverlapGene_UserID                                                                                                                                                                                                                                                                                                                                                                                                                                                                                                           |
|--------------------|------------|-------------------------------------------|-----------------------------------------------------------------------------------------------------------------------|------------|------------|------------------------------------------------------------------------------------------------------------------------------------------------------------------------------------------------------------------------------------------------------------------------------------------------------------------------------------------------------------------------------------------------------------------------------------------------------------------------------------------------------------------------------|
| Biological_Process | GO:0006397 | mRNA processing                           | <a href="http://amigo.geneontology.org/amigo/term/GO:0006397">http://amigo.geneontology.org/amigo/term/GO:0006397</a> | 3.01E-13   | 2.29E-10   | ISY1-RAB43;PDCD7;RBM7;BCAS2;ADAR;PPIH;KHDRBS1;AHCYL1;SRSF10;PAPOLA;WBP4;LEO1;U2AF1L4;SNW1;KDM1A;SF3B3;TFIP11;FUS;KIAA1429;PRPF31;PABPC1;AKAP8L;GPKOW;HTATSF1;DCPS;GTF2H1;HNRNPA1;HNRNPA2B1;NOVA1;CRNKL1;CDC40;CWC15;CDK12;PLRG1;PNN;PRMT7;RBM28;PSPC1;ZCCHC8;RBM22;CCAR1;PTBP1;PHRF1;METTL14;SUGP1;BARD1;SCAF1;RBBP6;PADP5;SRSF6;TRA2B;RBM15;SNRPB;SNRPC;SNRPE;SRPK2;SUPT6H;SLBP;SNRNP25;SLTM;PABPC1L;TSEN2;PABPN1;SF3A2;RBM10;WDR83;DXH16;KHSRP;SRSF9;RNGTT;YTHDC1;ZNRANB2;WTAP;TGS1;AQR;DXH38;DDX46;CDC5L;PAN2;RBM8A;THOC1 |
| Biological_Process | GO:0018205 | peptidyl-lysine modification              | <a href="http://amigo.geneontology.org/amigo/term/GO:0018205">http://amigo.geneontology.org/amigo/term/GO:0018205</a> | 9.76E-13   | 3.72E-10   | HDAC6;SAE1;TRIM28;USPL1;MCRS1;TADA3;STAG2;MORF4L1;MSL3;PRDM5;TAF1L;ATF2;FAM76B;CTBP1;FAM76A;MTF2;SIRT2;SNW1;KDM1A;SETD1B;USP22;JADE2;SIRT5;SIN3A;ZNF451;BLOC1S1;ELP4;TAF5L;KANSL1;SEN1;MECP2;PIAS4;PHF1;GNL3L;JING3;KANSL2;MSL2;KANSL3;YEATS2;KDM3A;KIAA1586;RAD21;RANBP2;ARID4A;RNF2;RNF4;PRDM16;BLM;NSD1;SUMO2;SNCA;SOX4;SUPT6H;MAP3K7;TPR;WRN;SAP130;SETD6;EPC1;AAAS;L3MBTL2;CBX2;CAMK1;EED;RPS6KA4;PIAS2;MTA1;H2AFY;SETD1A;MED24;SETDB1;NUP153                                                                           |
| Biological_Process | GO:0008380 | RNA splicing                              | <a href="http://amigo.geneontology.org/amigo/term/GO:0008380">http://amigo.geneontology.org/amigo/term/GO:0008380</a> | 4.92E-12   | 1.25E-09   | ISY1-RAB43;PDCD7;RBM7;BCAS2;PPIH;KHDRBS1;SRSF10;PAPOLA;WBP4;U2AF1L4;SNW1;KDM1A;SF3B3;TFIP11;FUS;KIAA1429;PRPF31;PABPC1;AKAP8L;GPKOW;ZNF638;HTATSF1;DCPS;HNRNPA1;HNRNPA2B1;NOVA1;CRNKL1;CDC40;CWC15;CDK12;PLRG1;PNN;PRMT7;RBM28;PSPC1;ZCCHC8;RBM22;CCAR1;PTBP1;METTL14;SUGP1;SCAF1;SRSF6;TRA2B;RBM15;SNRPB;SNRPE;SRPK2;SUPT6H;SLBP;SNRNP25;SLTM;PABPC1L;TSEN2;PABPN1;SF3A2;RBM10;WDR83;DXH16;PPP1R9B;KHSRP;SRSF9;YTHDC1;ZNRANB2;WTAP;TGS1;AQR;DXH38;DDX46;CDC5L;RBM8A;THOC1                                                   |
| Biological_Process | GO:0016570 | histone modification                      | <a href="http://amigo.geneontology.org/amigo/term/GO:0016570">http://amigo.geneontology.org/amigo/term/GO:0016570</a> | 1.61E-10   | 3.07E-08   | HDAC6;MCRS1;ZNHIT1;TADA3;MORF4L1;MSL3;PRDM5;LEO1;TAF1L;ATF2;CTBP1;MTF2;SIRT2;SNW1;KDM1A;SETD1B;SIN3B;USP22;JADE2;ZMYND8;SIN3A;ZNF451;ELP4;AKAP8L;TAF5L;KANSL1;MECP2;TRIM37;PHF21A;WAC;PHF1;PRMT7;JING3;KANSL2;MSL2;COPRS;OTUB1;PRKAA2;KANSL3;YEATS2;KDM3A;ATXN7L3;MTA3;ARID4A;RBBP4;RNF2;PRDM16;NSD1;SNCA;SUPT6H;MAP3K7;SAP130;SETD6;EPC1;KDM5C;BAP1;GSG2;ARID5B;BRMS1L;CAMK1;EED;RPS6KA4;BAZ1B;MTA1;PAXBP1;H2AFY;PPM1F;SETD1A;MED24;SETDB1;USP3                                                                             |
| Biological_Process | GO:0006281 | DNA repair                                | <a href="http://amigo.geneontology.org/amigo/term/GO:0006281">http://amigo.geneontology.org/amigo/term/GO:0006281</a> | 2.93E-09   | 4.47E-07   | CHAF1A;ISY1-RAB43;TRIM28;MCRS1;SLC30A9;MORF4L1;PNKP;UBE2F;ESCO2;APLF;PRIMPOL;FANCA;FANCD2;FANCE;FANCB;FANCF;FANCG;KDM1A;PDS5A;SPIDR;TFIP11;MCM9;XRCC6;RCHY1;C9orf142;BABAM1;GTF2H1;HUS1;LIG1;MSH2;COP2;PIAS4;PMS1;POLA1;RNF111;FANCL;FIGN;RFWD3;RIF1;FANCI;OTUB1;WRNIP1;TAOK1;BARD1;RAD21;RBBP8;UPF1;RFC1;BLM;COP57B;NUCKS1;INTS3;SUMO2;UBC;UBE2D3;UNG;WRN;C7orf49;NABP2;FTO;KLHL15;MND1;ATRIP;ASCC2;RAD54L;SMARCA5;BAZ1B;MTA1;ZNF830;ISG15;KIAA0430;AQR;CDC5L;USP3;REC8                                                     |
| Biological_Process | GO:1902275 | regulation of chromatin organization      | <a href="http://amigo.geneontology.org/amigo/term/GO:1902275">http://amigo.geneontology.org/amigo/term/GO:1902275</a> | 9.08E-06   | 0.0010753  | TRIM28;ZNHIT1;TADA3;TLK2;SPTY2D1;CTBP1;MTF2;SNW1;KDM1A;SIN3A;ZNF451;AKAP8L;HMGA1;MECP2;PHF1;OTUB1;KDM3A;NSD1;SNCA;SUPT6H;TPR;CAMK1;EED;RPS6KA4;PAXBP1;H2AFY;SETD1A;SETDB1                                                                                                                                                                                                                                                                                                                                                    |
| Biological_Process | GO:1903311 | regulation of mRNA metabolic process      | <a href="http://amigo.geneontology.org/amigo/term/GO:1903311">http://amigo.geneontology.org/amigo/term/GO:1903311</a> | 9.88E-06   | 0.0010753  | RBM7;KHDRBS1;AHCYL1;SRSF10;PAPOLA;LEO1;SNW1;PABPC1;HNRNPA2B1;ZC3HAV1;PTBP1;BARD1;UPF1;SRSF6;TRA2B;SRPK2;SUPT6H;SLTM;PABPN1;RBM10;KHSRP;SRSF9;YTHDC1;WTAP;RBM8A                                                                                                                                                                                                                                                                                                                                                               |
| Biological_Process | GO:0000075 | cell cycle checkpoint                     | <a href="http://amigo.geneontology.org/amigo/term/GO:0000075">http://amigo.geneontology.org/amigo/term/GO:0000075</a> | 1.78E-05   | 0.00169482 | FEM1B;PLK2;ATF2;ARID3A;FANCG;BABAM1;APC;HRAS;HUS1;MSH2;CNOT4;WAC;GTSE1;RFWD3;FANCI;PRCC;TAOK1;PTPN11;RBBP8;BLM;INTS3;SOX4;TPR;TTK;UBC;NABP2;MAD1L1;GSG2;ATRIP;TNKS1BP1;ZNF830;MAPKAPK2;MAD2L1BP;CDC5L;THOC1                                                                                                                                                                                                                                                                                                                  |
| Biological_Process | GO:0098732 | macromolecule deacylation                 | <a href="http://amigo.geneontology.org/amigo/term/GO:0098732">http://amigo.geneontology.org/amigo/term/GO:0098732</a> | 3.07E-05   | 0.00259629 | HDAC6;ZNHIT1;TADA3;MORF4L1;MSL3;PRDM5;CTBP1;SIRT2;KDM1A;SIN3B;SIRT5;SIN3A;AKAP8L;PHF21A;MTA3;ARID4A;RBBP4;BRMS1L;MTA1;PPT2                                                                                                                                                                                                                                                                                                                                                                                                   |
| Biological_Process | GO:0043543 | protein acylation                         | <a href="http://amigo.geneontology.org/amigo/term/GO:0043543">http://amigo.geneontology.org/amigo/term/GO:0043543</a> | 4.81E-05   | 0.00349969 | MCRS1;TADA3;MORF4L1;MSL3;TAF1L;ATF2;CTBP1;ESCO2;USP22;JADE2;SIN3A;ZNF451;BLOC1S1;ELP4;TAF5L;KANSL1;ZDHHC1;MECP2;ZDHHC3;JING3;KANSL2;PPM1A;MSL2;KANSL3;YEATS2;SNCA;SOX4;MAP3K7;SAP130;EPC1;CAMK1;RPS6KA4;MED24                                                                                                                                                                                                                                                                                                                |
| Biological_Process | GO:0040029 | regulation of gene expression, epigenetic | <a href="http://amigo.geneontology.org/amigo/term/GO:0040029">http://amigo.geneontology.org/amigo/term/GO:0040029</a> | 5.05E-05   | 0.00349969 | HDAC6;TRIM28;ADAR;MORF4L1;MSL3;WTIP;MTF2;ZCCHC1;SMCHD1;PUM2;SIRT5;SIN3A;HMGA1;HNRNPA2B1;MECP2;PHF1;DGCR8;PRMT7;NRGE2;SLC50A1;ARID4A;RBBP4;UPF1;SMARCD1;SUPT6H;EPC1;PABPC1L;SMARCA5;PRKRA;EED;BAZ1B;MTA1;H2AFY;SETDB1                                                                                                                                                                                                                                                                                                         |
| Biological_Process | GO:0006260 | DNA replication                           | <a href="http://amigo.geneontology.org/amigo/term/GO:0006260">http://amigo.geneontology.org/amigo/term/GO:0006260</a> | 0.0001584  | 0.0100583  | CHAF1A;STAG2;PNKP;ESCO2;DUT;PRIMPOL;PDS5A;ZBTB38;MCM9;SIN3A;GLI2;HMGA1;HRAS;HUS1;JUN;LIG1;NF2;ORC1;GMN1;POLA1;WRNIP1;PTMS;BARO1;RBBP4;RBBP8;RBM51;UPF1;RFC1;FAM111A;BLM;MAP2K4;NUCKS1;TF1;WRN;SLBP;ATRIP;ZNF830;GINS1;THOC1                                                                                                                                                                                                                                                                                                  |
| Biological_Process | GO:0032259 | methylation                               | <a href="http://amigo.geneontology.org/amigo/term/GO:0032259">http://amigo.geneontology.org/amigo/term/GO:0032259</a> | 0.00053053 | 0.03109713 | TRIM28;PEMT;PRDM5;METTL6;AHCY;LRTOMT;MTF2;SNW1;KDM1A;SETD1B;KIAA1429;GCSH;MAT2A;MECP2;METTL13;PHF1;PIK3CA;PRMT7;MPHOSPH8;GATAD2A;TRMT61B;COPRS;ATF7IP;KDM3A;CIAPIN1;GATAD2B;METTL14;ARID4A;PRDM16;NSD1;SNRPB;SUPT6H;SETD6;ASMTL;EED;METTL18;PAXBP1;H2AFY;WTAP;TGS1;SETD1A;SETDB1                                                                                                                                                                                                                                             |
| Biological_Process | GO:0071166 | ribonucleoprotein complex localization    | <a href="http://amigo.geneontology.org/amigo/term/GO:0071166">http://amigo.geneontology.org/amigo/term/GO:0071166</a> | 0.00068321 | 0.03718622 | SRSF10;UPF2;PRPF31;AKAP8L;HNRNPA2B1;CDC40;RANBP2;UPF1;SRSF6;SUPT6H;TPR;SLBP;AAAS;PABPN1;SRSF9;TGS1;DXH38;RBM8A;NUP153;THOC1                                                                                                                                                                                                                                                                                                                                                                                                  |
| Biological_Process | GO:0031529 | ruffle organization                       | <a href="http://amigo.geneontology.org/amigo/term/GO:0031529">http://amigo.geneontology.org/amigo/term/GO:0031529</a> | 0.00084068 | 0.04270654 | KANK1;CYFIP1;SH3YL1;DBNL;HRAS;ARF6;LIMA1;RCC2;TPM1;PIP5K1A                                                                                                                                                                                                                                                                                                                                                                                                                                                                   |
| Biological_Process | GO:0007034 | vacuolar transport                        | <a href="http://amigo.geneontology.org/amigo/term/GO:0007034">http://amigo.geneontology.org/amigo/term/GO:0007034</a> | 0.00101942 | 0.04854984 | SNF8;TRAK1;CHMP4A;RHOB;VPS36;VPS13D;SCYL2;VPS35;CHMP1B;KIF13A;RILP;BECN1;ATP6V0D1;HGS;TGFBRAP1;STX8;GOSR2;ZFYVE16                                                                                                                                                                                                                                                                                                                                                                                                            |
| Cellular_Component | GO:0005681 | spliceosomal complex                      | <a href="http://amigo.geneontology.org/amigo/term/GO:0005681">http://amigo.geneontology.org/amigo/term/GO:0005681</a> | 1.70E-09   | 2.51E-07   | ISY1-RAB43;PDCD7;BCAS2;ADAR;PPIH;WBP4;U2AF1L4;SNW1;SF3B3;TFIP11;PRPF31;PABPC1;HTATSF1;HNRNPA1;HNRNPA2B1;WAC;CRNKL1;CDC                                                                                                                                                                                                                                                                                                                                                                                                       |

**Supplementary Table 4 - Overrepresentation analysis results for GO terms among the 1,390 significant growth interactions using the Webgestalt program.**

|                    |            |                                                                               |                                                     |            |                                                                                                                               |                                                                                                                                                                                                                                                                                                                                                                                                                           |
|--------------------|------------|-------------------------------------------------------------------------------|-----------------------------------------------------|------------|-------------------------------------------------------------------------------------------------------------------------------|---------------------------------------------------------------------------------------------------------------------------------------------------------------------------------------------------------------------------------------------------------------------------------------------------------------------------------------------------------------------------------------------------------------------------|
|                    |            |                                                                               |                                                     |            | 40;CWC15;PLRG1;PNN;NRDE2;RBM28;PRCC;ZCCHC8;RBM22;SUGP1;UPF1;SNRPB;SNRPC;SNRPE;SNRNP25;SF3A2;WDR83;DHX16;AQR;DHX38;CDC5L;RBM8A |                                                                                                                                                                                                                                                                                                                                                                                                                           |
| Cellular_Component | GO:0016604 | nuclear body                                                                  | http://amigo.geneontology.org/amigo/term/GO:0016604 | 6.93E-08   | 5.13E-06                                                                                                                      | USPL1;PPIH;SRF10;WBP4;ATXN2L;FAM76B;DGKQ;U2AF1L4;SETD1B;TFIP11;RCHY1;PNISR;KIAA1429;ZNF451;PRPF31;AKAP8L;ZNF638;GLI2;HNRNPA2B1;ZFXH3;WAC;CRNKL1;PIAS4;CDK12;PLRG1;PNN;GATAD2A;RFWD3;PSPC1;MAPK7;CCNL1;GATAD2B;RNF2;RNF4;BLM;SRSF6;NOC3L;RFWD2;RBM15;SUMO2;SNRPC;ZMYM2;FTO;RNF34;PABPN1;SF3A2;PIPSK1A;PIAS2;ZNF830;YTHDC1;WTAP;TGS1;SETD1A;BCLAF1;DDX46;CDC5L;RBM8A;THOC1                                                  |
| Cellular_Component | GO:0034708 | methyltransferase complex                                                     | http://amigo.geneontology.org/amigo/term/GO:0034708 | 2.65E-06   | 0.00013053                                                                                                                    | MCRS1;C17orf49;MTF2;SETD1B;MGA;KIAA1429;PRPF31;KANSL1;TRIM37;PHF1;TRMT61B;CHD8;METTL14;RBBP4;RNF2;SNRPB;SNRPE;TAF4;EED;H2AFY;WTAP;SETD1A                                                                                                                                                                                                                                                                                  |
| Cellular_Component | GO:0044454 | nuclear chromosome part                                                       | http://amigo.geneontology.org/amigo/term/GO:0044454 | 1.77E-05   | 0.00065629                                                                                                                    | CHAF1A;TRIM28;BCAS2;CITED2;MCRS1;ZNHIT1;CENPC;P3H4;MORF4L1;KLHDC3;ESCO2;DVL3;SIRT2;KDM1A;SIN3B;SMCHD1;TFIP11;XRCC6;SIN3A;NSMF;HUS1;JUN;TRNP1;MSH2;ORC1;PLRG1;PMS1;POLA1;ING3;MPHOSPH8;PPP1R10;KDM3A;GATAD2B;PHF12;RAD21;RBBP4;REL;UPF1;RNF2;BLM;NUCKS1;SMARCE1;SP1;TAF4;TCF4;WRN;NABP2;SAP130;DSN1;ZMIZ2;BRMS1L;SMARCA5;TNKS1BP1;EED;TRIM24;BAZ1B;H2AFY;SETD1A;GINS1;CDC5L;USP3;THOC1;REC8                                |
| Cellular_Component | GO:1902493 | acetyltransferase complex                                                     | http://amigo.geneontology.org/amigo/term/GO:1902493 | 7.40E-05   | 0.00219181                                                                                                                    | MCRS1;TADA3;MORF4L1;MSL3;USP22;JADE2;ELP4;TAF5L;KANSL1;ING3;KANSL2;MSL2;KANSL3;YEATS2;ATXN7L3;TAF4;MAP3K7;SAP130;EPIC1;UBAP2L                                                                                                                                                                                                                                                                                             |
| Cellular_Component | GO:0031519 | PcG protein complex                                                           | http://amigo.geneontology.org/amigo/term/GO:0031519 | 0.00011714 | 0.00288941                                                                                                                    | CSNK2B;MTF2;CBX6;TRIM37;PHF1;RBBP4;RNF2;BAP1;CBX2;EED;H2AFY;UBAP2L                                                                                                                                                                                                                                                                                                                                                        |
| Cellular_Component | GO:0000785 | chromatin                                                                     | http://amigo.geneontology.org/amigo/term/GO:0000785 | 0.00021838 | 0.00461717                                                                                                                    | CHAF1A;TRIM28;CITED2;MCRS1;ZNHIT1;CENPC;STAG2;PLK2;MORF4L1;KLHDC3;ESCO2;DVL3;SIRT2;SNW1;KDM1A;PDS5A;SIN3B;CBX6;SIN3A;NSMF;AKAP8L;HMGA1;JUN;TRNP1;MECP2;POLA1;ING3;MPHOSPH8;PPP1R10;KDM3A;GATAD2B;PHF12;RAD21;RBBP4;REL;UPF1;RNF2;FAM111A;NUCKS1;SMARCE1;SP1;SUPT6H;TAF4;TCF4;TMPO;SAP130;BRMS1L;CBX2;TNKS1BP1;EED;TRIM24;BAZ1B;H2AFY;SETD1A;USP3                                                                          |
| Cellular_Component | GO:0098687 | chromosomal region                                                            | http://amigo.geneontology.org/amigo/term/GO:0098687 | 0.00085672 | 0.01584928                                                                                                                    | CENPC;PTGES3;STAG2;MBD6;ESCO2;SIRT2;KDM1A;PDS5A;SMCHD1;TFIP11;XRCC6;SIN3A;KANSL1;HNRNPA2B1;APC;MSH2;PPP1R12A;ORC1;ERCC6L;PPP1R10;CENPO;RIF1;MIS18BP1;RCC2;WRNIP1;RAD21;UPF1;BLM;TPR;TTK;WRN;NABP2;CENPO;DSN1;MAD11L;TNKS1BP1;DYNLL1;BAZ1B;KNSTRN;H2AFY;THOC1;REC8                                                                                                                                                         |
| Cellular_Component | GO:0017053 | transcriptional repressor complex                                             | http://amigo.geneontology.org/amigo/term/GO:0017053 | 0.00110477 | 0.0181673                                                                                                                     | CTBP1;SIRT2;SIN3A;HDGF;JUN;GATAD2A;GATAD2B;PHF12;ARID4A;RBBP4;RBBP8;PRDM16;SKIL;SMARCE1;YWHAB;SMARCA5                                                                                                                                                                                                                                                                                                                     |
| Cellular_Component | GO:0048475 | coated membrane                                                               | http://amigo.geneontology.org/amigo/term/GO:0048475 | 0.00181892 | 0.02692001                                                                                                                    | AP3S2;SEC24B;SEC23A;AP2M1;AP2S1;AP3S1;CLTC;COPA;COPB1;C3orf58;GGA2;AP4E1;CHMP4A;IGF2R;CHMP1B;EPS15L1                                                                                                                                                                                                                                                                                                                      |
| Cellular_Component | GO:0005813 | centrosome                                                                    | http://amigo.geneontology.org/amigo/term/GO:0005813 | 0.00237449 | 0.03142635                                                                                                                    | PROCR;PLK2;SDCCAG8;CCDC85B;TUBGCP5;LEO1;MPLKIP;PLEKHA7;TTBK2;DYNC1L12;ATF5;DZIP1;SIRT2;TTLL5;CAMSAP2;UBR4;G6PD;AATF;B9D1;VPS4A;GNAI1;CEP57L1;TRIM59;APC;ID1;RILPL1;SMAD7;MAP3K11;PPP1R12A;PARDA6A;IFT52;NIN;ERCC6L;CEP192;SPPL2B;MIB1;BBS4;RANBP1;KIF13A;RFWD2;STIL;WRN;AUNIP;TTCC6;TSEN2;CEP44;AAAS;MAD1L1;GS62;CEP89;DYNLL1;ATP6V0D1;MAPKAPK2;SNAP29;CEP104;CEP170                                                      |
| Cellular_Component | GO:0044440 | endosomal part                                                                | http://amigo.geneontology.org/amigo/term/GO:0044440 | 0.00261688 | 0.03142635                                                                                                                    | SLC9A6;EHD1;AP4S1;SNF8;AP2M1;AP2S1;CLCN5;ZFYVE27;CLTC;ARL8A;ABCA2;GGA2;PLEKHM2;VPS8;AP4E1;VPS4A;LAMTOR2;CHMP4A;ANXA1;ARF6;RHOB;LRPAP1;SLC11A2;VPS36;PLD1;NDIPF2;SCYL2;VPS35;RCC2;SPPL2B;CHMP1B;RAB5A;KIF13A;MAP3K7;UBC;UBE2D3;LDLRAD4;FZD7;RILP;WDR83;SPPL2A;BECN1;CD164;MTMR4;ATP6V0D1;HGS;TGFBRAP1;STX8;GOSR2;ZFYVE16;SNX17                                                                                             |
| Cellular_Component | GO:0000118 | histone deacetylase complex                                                   | http://amigo.geneontology.org/amigo/term/GO:0000118 | 0.00276042 | 0.03142635                                                                                                                    | HDAC6;MORF4L1;SIN3B;SIN3A;HINT1;PHF21A;GATAD2A;GATAD2B;PHF12;RBBP4;SAP130;BRMS1L                                                                                                                                                                                                                                                                                                                                          |
| Molecular_Function | GO:0003682 | chromatin binding                                                             | http://amigo.geneontology.org/amigo/term/GO:0003682 | 7.63E-08   | 2.05E-05                                                                                                                      | CHAF1A;TRIM28;CITED2;SLC30A9;ZNHIT1;MORF4L1;MBD6;KLHDC3;ATF2;CSNK2B;NKK2-5;ARID3A;PRIMPOL;ATF5;SIRT2;KDM1A;FOXC2;CAMTA2;SIN3B;CABIN1;ZMYND8;SIN3A;GLI2;GTF2H1;HMGA1;JUN;MECP2;TRIM37;ORC1;PHF21A;WAC;PHF1;POLA1;PRKAA2;KDM3A;GATAD2B;MTA3;PHF12;CHD8;RAD21;RBBP4;REL;UPF1;RNF2;RNF4;NOC3L;NSD1;NUCKS1;SKIL;SMARCD1;SMARCE1;SOX15;SUPT6H;TPR;TTF1;WRN;TDRD3;BAP1;SMARCA5;CBX2;EED;TRIM24;BAZ1B;MTA1;H2AFY;SETDB1;USP3;REC8 |
| Molecular_Function | GO:0019787 | ubiquitin-like protein transferase activity                                   | http://amigo.geneontology.org/amigo/term/GO:0019787 | 1.10E-06   | 0.00013443                                                                                                                    | FEM1B;TRIM28;MAEA;KLHL41;TRIM3;UBE2F;RNF217;FANCF;FBXO21;UBR4;UFL1;PPIL2;HECTD1;RCHY1;KBTBD2;ZNF451;FOXO2;UBE2S;RABGEF1;RNF149;TRIM59;TRIM37;CNOT4;RNF181;UFC1;PIAS4;MPHOSPH8;RNF111;KLHL28;UBE2R2;FANCL;RFWD3;MSL2;RNF130;PELI1;MIB1;KIAA1586;BARD1;RANBP2;RBBP6;RNF2;RNF4;RNF5;RFWD2;UNKL;RMND5B;TRAF2;TTC3;UBE2D3;UBE2E2;FBXL15;RNF34;KLHL15;CBL;TRIM24;UBE3B;KLHL13;PIAS2;MED17;MED24                                 |
| Molecular_Function | GO:0016874 | ligase activity                                                               | http://amigo.geneontology.org/amigo/term/GO:0016874 | 1.50E-06   | 0.00013443                                                                                                                    | SAE1;TRIM28;FARS2;UBE2F;ADSS;ACSL1;MYCBP2;TTLL5;UBR4;UFL1;FPGS;PPIL2;RCHY1;ZNF451;TTLL3;RNF149;GSS;SLC27A1;LIG1;ASNS;TRIM37;CNOT4;RNF181;PIAS4;RNF111;FANCL;RFWD3;MSL2;UBA6;RNF130;TRIM39;KCMF1;PELI1;MIB1;KIAA1586;RANBP2;RBBP6;RNF2;RNF4;RNF5;MCCC2;RFWD2;UNKL;TRAF2;TTC3;CAD;UBA5;RNF34;CBL;SUCLA2;TRIM24;PIAS2                                                                                                        |
| Molecular_Function | GO:0042393 | histone binding                                                               | http://amigo.geneontology.org/amigo/term/GO:0042393 | 3.98E-05   | 0.00267377                                                                                                                    | IPO7;MSL3;TAF1L;SPY2D1;MTF2;ZMYND8;PHF21A;PHF1;PRMT7;ING3;MPHOSPH8;PHIP;COPRS;PTMA;PHF12;CHD8;RBBP4;BRD9;SNCA;SUPT6H;TDRD3;L3MBTL2;SMARCA5;CBX2;TRIM24;BAZ1B;USP3                                                                                                                                                                                                                                                         |
| Molecular_Function | GO:0001076 | transcription factor activity, RNA polymerase II transcription factor binding | http://amigo.geneontology.org/amigo/term/GO:0001076 | 0.00011461 | 0.00616585                                                                                                                    | TRIM28;CITED2;TCERG1;TAF1L;ATF2;NKK2-5;CTBP1;MED19;SIN3B;ZMYND8;SIN3A;ZNF451;HDGF;JUN;PHF12;RBBP8;SOX4;SOX12;TCF4;TTF1;MINA;MED17;MED24;CDC5L                                                                                                                                                                                                                                                                             |

**Supplementary Table 4** - Overrepresentation analysis results for GO terms among the 1,390 significant growth interactions using the Webgestalt program.

|                    |            |                                          |                                                                                                                       |                |            |                                                                                                                                                                                                                                                                                                                |
|--------------------|------------|------------------------------------------|-----------------------------------------------------------------------------------------------------------------------|----------------|------------|----------------------------------------------------------------------------------------------------------------------------------------------------------------------------------------------------------------------------------------------------------------------------------------------------------------|
| Molecular_Function | GO:0070491 | repressing transcription factor binding  | <a href="http://amigo.geneontology.org/amigo/term/GO:0070491">http://amigo.geneontology.org/amigo/term/GO:0070491</a> | 0.00034<br>506 | 0.01523331 | TCERG1;PRDM5;CTBP1;ZMYND8;SIN3A;GMNN;BBS4;RBBP8;RELA;SKIL;DDRKG1;SP1;MTA1                                                                                                                                                                                                                                      |
| Molecular_Function | GO:0036002 | pre-mRNA binding                         | <a href="http://amigo.geneontology.org/amigo/term/GO:0036002">http://amigo.geneontology.org/amigo/term/GO:0036002</a> | 0.00039<br>641 | 0.01523331 | U2AF1L4;HNRNPA2B1;RBM22;PTBP1;SRSF6;TRA2B;SNRPC;SLBP                                                                                                                                                                                                                                                           |
| Molecular_Function | GO:0003713 | transcription coactivator activity       | <a href="http://amigo.geneontology.org/amigo/term/GO:0003713">http://amigo.geneontology.org/amigo/term/GO:0003713</a> | 0.00092<br>718 | 0.03117649 | TRIM28;CITED2;SLC30A9;TADA3;TCERG1;SUB1;NCOA7;ATF2;FGF2;SNW1;KDM1A;USP22;FUS;TAF5L;HMGA1;JUN;CCAR1;ATXN7L3;RNF4;PRDM16;SMARCD1;SMARCE1;SOX4;SOX12;TAF4;ZFX;SAP130;TDRD3;ZMIZ2;ARID5B;EDF1;TRIM24;PIAS2;MTA1;MED17;TBPL1;MED24                                                                                  |
| Molecular_Function | GO:0004674 | protein serine/threonine kinase activity | <a href="http://amigo.geneontology.org/amigo/term/GO:0004674">http://amigo.geneontology.org/amigo/term/GO:0004674</a> | 0.00136<br>732 | 0.04055157 | STK25;CAMKK2;PLK2;TLK2;CIT;TAF1L;CSNK2B;TTBK2;NIM1K;AAK1;ICK;TNIK;DSTYK;RPS6KA6;GTF2H1;ARAF;LTBP1;MAP3K11;PAK1;CDK18;CAB39;CDK12;PIK3CA;ULK4;PRKAA2;PRKCE;MAPK7;MAP2K5;CAMK1D;ADCK1;TAOK1;BCR;MAP2K4;WNK1;BRAF;SRPK2;STK3;STK10;MAP3K7;TTK;GSG2;ULK1;CAMK1;RIOK3;CCND3;RPS6KA4;MAP3K6;ACVR2A;MAPKAPK2;CDC42BPB |
| Molecular_Function | GO:0008022 | protein C-terminus binding               | <a href="http://amigo.geneontology.org/amigo/term/GO:0008022">http://amigo.geneontology.org/amigo/term/GO:0008022</a> | 0.00165<br>805 | 0.04055157 | SAE1;TRIM3;PRDX3;YWHAQ;SNF8;CTBP1;XRCC6;PABPC1;VPS4A;DBNL;HRAS;ID1;BCAM;MSH2;VPS36;IFT52;PIAS4;PEX1;FIGN;SP1;TAF13;TCF4;YWHAB;SNX17                                                                                                                                                                            |
| Molecular_Function | GO:0019213 | deacetylase activity                     | <a href="http://amigo.geneontology.org/amigo/term/GO:0019213">http://amigo.geneontology.org/amigo/term/GO:0019213</a> | 0.00165<br>824 | 0.04055157 | HDAC6;SIRT2;KDM1A;SIN3B;SIN3A;PHF21A;MTA3;ARID4A;RBBP4;BRMS1L;MTA1                                                                                                                                                                                                                                             |

**Supplementary Table 5** - Plasmids used in this study.

| Plasmid ID | plasmid name                     | Purpose                                            | Source       | Insert                          | Promoter | Marker(s)   |
|------------|----------------------------------|----------------------------------------------------|--------------|---------------------------------|----------|-------------|
| * DA007    | pDA007                           | ORFeus expression, WT                              | Burns Lab    | ORFeus-Hs, ORF2-3xFlag          | Tet, 2nd | puromycin   |
| * DA019    | pDA019                           | control expression vector                          | Burns Lab    | Multiple Cloning Site           | Tet, 2nd | puromycin   |
| * DA025    | pDA025                           | ORFeus expression, mutant                          | Burns Lab    | ORFeus H230A En, ORF2-3xFlag    | Tet, 2nd | puromycin   |
| * DA027    | pDA027                           | ORFeus expression, mutant                          | Burns Lab    | ORFeus H230A/D702Y, ORF2-3xFlag | Tet, 2nd | puromycin   |
| * DA034    | pDA034                           | ORFeus expression, mutant                          | Burns Lab    | ORFeus D702Y RT, ORF2-3xFlag    | Tet, 2nd | puromycin   |
| DA055      | pDA055                           | ORFeus expression, WT                              | Burns Lab    | ORFeus-Hs, ORF2-3xFlag          | Tet, 3rd | hygromycin  |
| * DA056    | pDA056                           | ORFeus expression, WT                              | Burns Lab    | ORFeus-Hs                       | Tet, 3rd | blasticidin |
| DA064      | psPAX2                           | lentivirus packaging                               | AJ Holland   |                                 |          |             |
| DA065      | pMD.G                            | lentivirus packaging                               | AJ Holland   |                                 |          |             |
| * DA077    | pDA077                           | L1RP expression                                    | Burns Lab    | L1RP                            | CMV      | neomycin    |
| DA079      | pOT_p53shRNA_Lentivirus_TagRFP_T | TP53 shRNA lentivirus                              | AJ Holland   | p53 shRNA                       | H1       | TagRFP      |
| DA081      | pSicoR_mCh_empty                 | control for TP53 shRNA lenti                       | Addgene      | empty                           | H1       | mCherry     |
| * DA083    | pDA083                           | eGFP expression                                    | Burns Lab    | eGFP                            | CMV      | neomycin    |
| DA090      | pCMV(CAT)T7-SB100                | generation of Tet-On RPE                           | Addgene      | sleeping beauty                 | CMV      |             |
| DA091      | pSBtet-RN                        | generation of Tet-On RPE                           | Addgene      | Luciferase                      | Tet, 2nd | G418, RFP   |
| * DA093    | pDA093                           | generation of Tet-On RPE                           | Burns Lab    | ORFeus                          | Tet, 2nd | G418, RFP   |
| DA094      | pSBtet-GN                        | generation of Tet-On RPE                           | Burns Lab    | Luciferase                      | Tet, 2nd | G418, eGFP  |
| * DA095    | pDA095                           | generation of Tet-On RPE                           | Burns Lab    | ORFeus                          | Tet, 2nd | G418, eGFP  |
| DA097      | pLentiGuide-Puro                 | generation of CRISPR KO cells                      | Addgene      |                                 | U6       | puromycin   |
| JM111      | pJM111                           | L1RP retrotransposition reporter, negative control | Kazazian Lab | L1RP (inactive) GFP-AI          | CMV      | puromycin   |
| * MT525    | pMT525                           | L1RP retrotransposition reporter                   | Boeke Lab    | L1RP GFP-AI                     | CMV      | puromycin   |

\* Plasmid available at [https://www.addgene.org/Kathleen\\_Burns/](https://www.addgene.org/Kathleen_Burns/)  
Please contact the indicated source lab for all other plasmids

**Supplementary Table 6** - Oligonucleotides used in this study.

| Method | Category                   | Primer Name          | Sequence (5' - 3')                                                                           |
|--------|----------------------------|----------------------|----------------------------------------------------------------------------------------------|
| PCR    | Screen Library Preparation | GECKO_PCR2_F01       | AATGATACGGCGACCACCGAGATCTACACTCTTCCCTACACGACGCTCTCCGATCTNNNNAAGTAGAGtcttggaaaggacgaaacaccg   |
| PCR    | Screen Library Preparation | GECKO_PCR2_F02       | AATGATACGGCGACCACCGAGATCTACACTCTTCCCTACACGACGCTCTCCGATCTNNNNNACAGGATCtcttggaaaggacgaaacaccg  |
| PCR    | Screen Library Preparation | GECKO_PCR2_F03       | AATGATACGGCGACCACCGAGATCTACACTCTTCCCTACACGACGCTCTCCGATCTNNNNNCGCGCGGTtcttggaaaggacgaaacaccg  |
| PCR    | Screen Library Preparation | GECKO_PCR2_F04       | AATGATACGGCGACCACCGAGATCTACACTCTTCCCTACACGACGCTCTCCGATCTNNNNNNCATGATGtcttggaaaggacgaaacaccg  |
| PCR    | Screen Library Preparation | GECKO_PCR2_F05       | AATGATACGGCGACCACCGAGATCTACACTCTTCCCTACACGACGCTCTCCGATCTNNNNCGTTACCActtggaaaggacgaaacaccg    |
| PCR    | Screen Library Preparation | GECKO_PCR2_F06       | AATGATACGGCGACCACCGAGATCTACACTCTTCCCTACACGACGCTCTCCGATCTNNNNNTCCTGGTtcttggaaaggacgaaacaccg   |
| PCR    | Screen Library Preparation | GECKO_PCR2_F07       | AATGATACGGCGACCACCGAGATCTACACTCTTCCCTACACGACGCTCTCCGATCTNNNNNNAACGCATTtcttggaaaggacgaaacaccg |
| PCR    | Screen Library Preparation | GECKO_PCR2_F08       | AATGATACGGCGACCACCGAGATCTACACTCTTCCCTACACGACGCTCTCCGATCTNNNNNNACAGGTATtcttggaaaggacgaaacaccg |
| PCR    | Screen Library Preparation | GECKO_PCR2_F09       | AATGATACGGCGACCACCGAGATCTACACTCTTCCCTACACGACGCTCTCCGATCTNNNNNAGGTAAGtcttggaaaggacgaaacaccg   |
| PCR    | Screen Library Preparation | GECKO_PCR2_F10       | AATGATACGGCGACCACCGAGATCTACACTCTTCCCTACACGACGCTCTCCGATCTNNNNNAACAATGGtcttggaaaggacgaaacaccg  |
| PCR    | Screen Library Preparation | GECKO_PCR2_F11       | AATGATACGGCGACCACCGAGATCTACACTCTTCCCTACACGACGCTCTCCGATCTNNNNNNACTGTATCtcttggaaaggacgaaacaccg |
| PCR    | Screen Library Preparation | GECKO_PCR2_F12       | AATGATACGGCGACCACCGAGATCTACACTCTTCCCTACACGACGCTCTCCGATCTNNNNNNAGGTCGCAtcttggaaaggacgaaacaccg |
| PCR    | Screen Library Preparation | GECKO_PCR2_R02       | CAAGCAGAAGACGGCATAACGATACACGATCGTGACTGGAGTTCAGACGTGTGCTCTCCGATCTNNNNNTCTACTATTCTTCCCTGCACTGT |
| PCR    | Cloning                    | SB-ORFeus-5          | GTACCATTCTACCTCGAAAGGCCTCTGATGGGCAAGAAGCAGAACCG                                              |
| PCR    | Cloning                    | SB-ORFeus-3          | TCATGTCTATCGATGGAAGCTTGGCCTGACATCAGTTGCCGCCGATCAGGC                                          |
| PCR    | qRT-PCR                    | DA.q13.CDKN1A.left   | TGTCTGTACCCTTGTGCCT                                                                          |
| PCR    | qRT-PCR                    | DA.q14.CDKN1A.right  | AAGATGTAGAGCGGGCCTTT                                                                         |
| PCR    | qRT-PCR                    | DA.q45.GAPDH.forward | GGATTTGGTCGTATTGGG                                                                           |
| PCR    | qRT-PCR                    | DA.q46.GAPDH.reverse | GGAAGATGGTGATGGGATT                                                                          |
| PCR    | qRT-PCR                    | DA.q.IFNB1.forward   | AGCTGCTTAATCTCCTCAGGG                                                                        |
| PCR    | qRT-PCR                    | DA.q.IFNB1.reverse   | TCTCCTGTTGTGCTTCTCCA                                                                         |
| PCR    | qRT-PCR                    | DA.q.TLR3.forward    | TGTCTCATAATGGCTTGTCTATCT                                                                     |
| PCR    | qRT-PCR                    | DA.q.TLR3.reverse    | GGCCAAATAATCTTCCAATTGCG                                                                      |
| PCR    | qRT-PCR                    | DA.q.IFIT2.forward   | AAACAAGTCTCCATCTGCG                                                                          |
| PCR    | qRT-PCR                    | DA.q.IFIT2.reverse   | TGCAAAGCCTCAGAATCTGC                                                                         |
| PCR    | qRT-PCR                    | DA.q.IFIT1.forward   | GCTTTCAAATCCCTCCGCT                                                                          |
| PCR    | qRT-PCR                    | DA.q.IFIT1.reverse   | TAGGCAGAGATCGCATAACCC                                                                        |
| PCR    | qRT-PCR                    | DA.q15.ORFeus.left   | AAGATCATCCGCGCATCTA                                                                          |
| PCR    | qRT-PCR                    | DA.q16.ORFeus.right  | TCAGCTTCACTCCTCTTG                                                                           |



**Supplementary Table 6** - Oligonucleotides used in this study.

|              |                    |           |                       |
|--------------|--------------------|-----------|-----------------------|
| CRISPR oligo | Non-target-control | GPP_76767 | CCATTCACAATCCCACTACA  |
| CRISPR oligo | Non-target-control | GPP_77342 | TGAGCATTCGTAGCCCAGCA  |
| CRISPR oligo | TP53 Knockout      | GPP_19455 | GATCCACTCACAGTTTCCAT  |
| CRISPR oligo | TP53 Knockout      | GPP_19456 | GGTGCCCTATGAGCCGCCTG  |
| CRISPR oligo | CDKN1A Knockout    | GPP_02927 | GTCACCGAGACCACTGGA    |
| CRISPR oligo | CDKN1A Knockout    | GPP_02925 | AGTCGAAGTTCCATCGCTCA  |
| CRISPR oligo | FANCM Knockout     | GPP_46254 | TGACGGTGGTTACAACACGC  |
| CRISPR oligo | FANCA Knockout     | GPP_06027 | GACACACAGAACCTTCCGAG  |
| CRISPR oligo | FANCL Knockout     | GPP_41632 | CGAGATGAATCCCTCATACA  |
| CRISPR oligo | FANCI Knockout     | GPP_41960 | TATGACTGTATTCTTATACC  |
| CRISPR oligo | FANCD2 Knockout    | GPP_06034 | AGTTGACTGACAATGAGTCG  |
| CRISPR oligo | ATRIP Knockout     | GPP_52946 | TCCTAGGAAAAACCCTTCTG  |
| CRISPR oligo | PPHLN1 Knockout    | GPP_38975 | AGGTGTTAGACAAACCCAGT  |
| CRISPR oligo | TASOR Knockout     | GPP_32305 | GGAAAACGAAATAACTCAAG  |
| CRISPR oligo | MPP8 Knockout      | GPP_40459 | ATACATCGGATGATGATACC  |
| CRISPR oligo | MORC2 Knockout     | GPP_31095 | ACATTAGAAGTACGCCTAGG  |
| CRISPR oligo | SETDB1 Knockout    | GPP_26249 | AAGGAAAGAGTCTACTGTCTG |

**Supplementary Methods – Key Reagents In This Study**

| <b>REAGENT or RESOURCE</b>                           | <b>SOURCE</b>             | <b>IDENTIFIER</b> |
|------------------------------------------------------|---------------------------|-------------------|
| <b>Antibodies</b>                                    |                           |                   |
| Anti-Mouse Alexa Fluor 568                           | ThermoFisher              | Cat# A-11004      |
| Anti-Rabbit Alexa Fluor 488                          | ThermoFisher              | Cat# A-11034      |
| IRDye® 680RD Goat anti-Mouse IgG                     | LI-COR                    | Cat# 925-68070    |
| IRDye® 680RD Goat anti-Rabbit IgG                    | LI-COR                    | Cat# 925-68071    |
| IRDye® 800CW Goat anti-Mouse IgG                     | LI-COR                    | Cat# 925-32210    |
| IRDye® 800CW Goat anti-Rabbit IgG                    | LI-COR                    | Cat# 925-32211    |
| Mouse Anti-Flag                                      | Sigma                     | F1804             |
| Mouse Anti-Human FANCD2 Clone FI17                   | Santa Cruz                | Cat# sc-20022     |
| Mouse Anti-Human ORF1p Clone 4H1                     | Millipore Sigma           | MABC1152          |
| Mouse Anti-Human p53 Clone D0-1                      | CalBiochem                | Cat# OP43         |
| Mouse Anti-human $\gamma$ H2A.X, Clone JBW301        | EMD Millipore             | Cat# 05-636       |
| Mouse Anti-RPA2, Clone 9H8                           | Abcam                     | Cat# ab2175       |
| Rabbit Anti 53BP1                                    | Novus Bio                 | Cat# NB100-904    |
| Rabbit Anti p-RPA S4/S8                              | Bethyl                    | Cat# A300-245A    |
| Rabbit Anti-H3                                       | Abcam                     | Cat #1791         |
| Rabbit Anti-Human Beta-Tubulin Clone 9F3             | Cell Signaling Technology | Cat# 2128         |
| Rabbit Anti-Human FANCD2                             | Novus Bio                 | Cat# NB100-182    |
| Rabbit Anti-Human FANCI Clone 589                    | Agata Smogorzewska        | Clone 589         |
| Rabbit Anti-Human ORF2p Clone MT49                   | In-house production       | MT49              |
| <b>Chemicals, Peptides, and Recombinant Proteins</b> |                           |                   |
| 3-8% Tris-Acetate Gel                                | ThermoFisher              | Cat# EA0375BOX    |

**Supplementary Methods – Key Reagents In This Study**

|                                         |                           |                 |
|-----------------------------------------|---------------------------|-----------------|
| 4-12% BisTris Gel                       | ThermoFisher              | Cat# NP0322BOX  |
| 4-20% Mini TGX Gel                      | Biorad                    | Cat# 4561094    |
| 50% Gluteraldehyde                      |                           |                 |
| 7.5% Mini TGX Gel                       | Biorad                    | Cat# 4561023    |
| CellTiter-Glo 2.0                       | Promega                   | Cat# G9241      |
| Crystal Violet                          | Sigma                     | Cat# C6158-50G  |
| DMEM/F12                                | ThermoFisher              | Cat# 11320033   |
| Doxorubicin                             | Cell signaling Technology | Cat# 5927S      |
| Doxycycline                             | Takara                    | Cat# 631311     |
| Fugene HD                               | Promega                   | Cat# E2311      |
| G418                                    | Corning Cellgro           | Cat# 61-234-RF  |
| HCS CellMask deep red cytoplasmic stain | ThermoFisher              | Cat# H32721     |
| HiFi 2X Assembly Master Mix             | New England Biolabs       | Cat# E2621S     |
| Hoechst 33342                           | Sigma                     |                 |
| Immobilon PVDF Membrane                 | LI-COR                    |                 |
| Laemmli Sample Buffer                   | Biorad                    | Cat# 1610747    |
| ONE-Glo                                 | Promega                   | Cat# E6110      |
| Opti-MEM I Reduced Serum Media          | Gibco                     | Cat# 31985062   |
| Poly-D-Lysine                           | Sigma                     | Cat# P6407-5MG  |
| Polybrene                               | Millipore Sigma           | Cat# TR-1003-G  |
| Protease/Phosphatase Inhibitor          | Cell Signaling Technology | Cat# 5872       |
| Proteinase K                            | New England Biolabs       | Cat# P8107S     |
| Puromycin                               | Millipore Sigma           | Cat# P8833-25MG |
| Q5 Hot-start polymerase master mix      | New England Biolabs       | Cat# M0494      |
| RNase A                                 | ThermoFisher              | Cat# EN0531     |
| Sodium Bicarbonate 7.5% solution        | ThermoFisher              | Cat# 25080094   |

**Supplementary Methods – Key Reagents In This Study**

|                                                                                                                                 |                      |               |
|---------------------------------------------------------------------------------------------------------------------------------|----------------------|---------------|
| Tet System Approved FBS                                                                                                         | Takara               | Cat# 631367   |
| Tris-Acetate SDS Running Buffer                                                                                                 | ThermoFisher         | Cat# LA0041   |
| Viafect                                                                                                                         | Promega              | Cat# E4981    |
| <b>Critical Commercial Assays</b>                                                                                               |                      |               |
| Click-IT EdU Alexa Fluor 647 Imaging Kit                                                                                        | ThermoFisher         | Cat# C10340   |
| DAKO EnVision+ System-HRP kit                                                                                                   | Agilent              | Cat# K4006    |
| iScript cDNA Synthesis Kit                                                                                                      | Biorad               | Cat# 1708891  |
| NEBNext Library Quant Kit                                                                                                       | New England Biolabs  | Cat# E7630S   |
| PureLink HiPure Plasmid Filter Maxiprep Kit                                                                                     | ThermoFisher         | Cat# K210016  |
| PureLink HiPure Plasmid Filter Midiprep Kit                                                                                     | ThermoFisher         | Cat# K210014  |
| Quick-RNA Microprep kit                                                                                                         | Zymo                 | Cat# R1051    |
| SsoAdvanced™ Universal SYBR® Green Supermix                                                                                     | Biorad               | Cat# 1725270  |
| TruSeq Stranded mRNA Library Prep                                                                                               | Illumina             | Cat# 20020594 |
| ZymoPURE Plasmid Miniprep Kit                                                                                                   | Zymo                 | Cat# D4212    |
| <b>Deposited Data</b>                                                                                                           |                      |               |
| All raw sequencing files and processed screen and RNAseq data have been uploaded to the GEO database under accession GSE119999. |                      |               |
| <b>Experimental Models: Cell Lines</b>                                                                                          |                      |               |
| HEK293FT                                                                                                                        | AJ Holland           |               |
| hTERT-RPE-Cas9-p53_shRNA, Clone 2                                                                                               | This study           |               |
| hTERT-RPE-Cas9-p53_shRNA, Tet-On codon-optimized L1                                                                             | This study           |               |
| hTERT-RPE-Cas9-p53_shRNA, Tet-On Luciferase                                                                                     | This study           |               |
| hTERT-RPE-Cas9 <sup>puroS</sup>                                                                                                 | Lambrus et al., 2016 |               |
| hTERT-RPE, Tet-On codon-optimized L1                                                                                            | This study           |               |
| hTERT-RPE, Tet-On Luciferase                                                                                                    | This study           |               |
| hTERT-RPE1 <sup>puroS</sup>                                                                                                     | Lambrus et al., 2016 |               |
| Tet-On 3G HEK293                                                                                                                | Takara               | Cat# 631182   |

**Supplementary Methods – Key Reagents In This Study**

|                                                          |                          |                                                                                                                                               |
|----------------------------------------------------------|--------------------------|-----------------------------------------------------------------------------------------------------------------------------------------------|
| Tet-On 3G HeLa                                           | Takara                   | Cat# 631183                                                                                                                                   |
| Tet-On HEK293T <sub>LD</sub>                             | Taylor et al., 2013      |                                                                                                                                               |
| <b>Recombinant DNA</b>                                   |                          |                                                                                                                                               |
| see Supplemental Table 5 for plasmids used in this study |                          |                                                                                                                                               |
| <b>Oligonucleotides</b>                                  |                          |                                                                                                                                               |
| see Supplemental Table 6 for oligos used in this study   |                          |                                                                                                                                               |
| <b>Software and Algorithms</b>                           |                          |                                                                                                                                               |
| BD C6 Software                                           | BD                       |                                                                                                                                               |
| Bowtie                                                   | Langmead et al., 2009    | <a href="http://bowtie-bio.sourceforge.net/manual.shtml">http://bowtie-bio.sourceforge.net/manual.shtml</a>                                   |
| DESeq2                                                   | Love et al., 2014        | <a href="https://bioconductor.org/packages/release/bioc/html/DESeq2.html">https://bioconductor.org/packages/release/bioc/html/DESeq2.html</a> |
| GSEA v2.0                                                | Subramanian et al., 2005 | <a href="http://software.broadinstitute.org/gsea/index.jsp">http://software.broadinstitute.org/gsea/index.jsp</a>                             |
| HTSeq                                                    | Anders et al., 2015      | <a href="https://htseq.readthedocs.io/en/release_0.10.0/">https://htseq.readthedocs.io/en/release_0.10.0/</a>                                 |
| Image Studio Software v4.0                               | LI-COR                   | <a href="https://www.licor.com/bio/products/software/image_studio_lite/">https://www.licor.com/bio/products/software/image_studio_lite/</a>   |
| ImageJ                                                   | NIH                      | <a href="https://imagej.nih.gov/ij/">https://imagej.nih.gov/ij/</a>                                                                           |

**Supplementary Methods – Key Reagents In This Study**

|                                       |                         |                                                                                                       |
|---------------------------------------|-------------------------|-------------------------------------------------------------------------------------------------------|
| MAGeCK v0.5.6, v0.5.7                 | Liu et al., 2014        | <a href="https://sourceforge.net/p/mageck/wiki/Home/">https://sourceforge.net/p/mageck/wiki/Home/</a> |
| MATLAB                                |                         | <a href="https://www.mathworks.com/">https://www.mathworks.com/</a>                                   |
| R v3.4, v3.5                          |                         | <a href="https://www.r-project.org/">https://www.r-project.org/</a>                                   |
| STAR v2.4.5                           | Dobin et al., 2013      | <a href="https://github.com/alexdobin/STAR">https://github.com/alexdobin/STAR</a>                     |
| StringDB                              | Szklarczyk et al., 2017 | <a href="https://string-db.org/">https://string-db.org/</a>                                           |
| WebGestalt 2017                       | Wang et al., 2017       | <a href="http://www.webgestalt.org/option.php">http://www.webgestalt.org/option.php</a>               |
| <b>Other</b>                          |                         |                                                                                                       |
| BD Accuri C6 Flow Cytometer           | BD                      |                                                                                                       |
| Glomax Multi+ Detection System        | Promega                 |                                                                                                       |
| HiSeq 2500                            | Illumina                |                                                                                                       |
| Licor Odyssey Scanner                 | LI-COR                  |                                                                                                       |
| MyIQ Thermocycler                     | Biorad                  |                                                                                                       |
| NextSeq 500                           | Illumina                |                                                                                                       |
| Nikon TE300 epifluorescent microscope | Nikon                   |                                                                                                       |
| Trans-Blot-Turbo                      | Biorad                  |                                                                                                       |
| Xcell II Blot Module                  | ThermoFisher            |                                                                                                       |
